# Supplementary material for: Direct Viral RNA Detection of SARS-CoV-2 and DENV in Inactivated Samples by Real-Time RT-qPCR: Implications for Diagnosis in Resource Limited Settings with Flavivirus Co-Circulation
Source: MDPI journal article supplement (doi:10.3390/pathogens10121558), 2021-11-29
Supplement: s1 [file s1]

**Table S1.** Oligonucleotide primers and fluorogenic probes used in the SARS-CoV-2 and DENV-2 real-time RT-qPCR assays.

| <b>Virus</b> | <b>Primer and probes</b> | <b>Nucleotide sequence (5' → 3')</b> | <b>Target gene</b> |
|--------------|--------------------------|--------------------------------------|--------------------|
| SARS-CoV-2   | Forward Primer           | CACATTGGCACCCGCAATC                  | N<br>(Sarbeco)     |
|              | Reverse Primer           | GAGGAACGAGAAGAGGCTTG                 |                    |
|              | Probe                    | FAM-ACTTCCTCAAGGAACAACATTGCCA-BHQ    |                    |
|              | Forward Primer           | ACAGGTACGTTAATAGTTAATAGCGT           | E<br>(Sarbeco)     |
|              | Reverse Primer           | ATATTGCAGCAGTACGCACACA               |                    |
|              | Probe                    | FAM-ACACTAGCCATCCTTACTGCGCTTCG-BHQ   |                    |
| DENV-2       | Forward Primer           | ACACCACAGAGTTCCATCACAGA              | E                  |
|              | Reverse Primer           | CATCTCATTGAAGTCNAGGCC                |                    |
|              | Probe                    | FAM- CGATGGARTGCTCTC-BHQ             |                    |
